# Supplementary material for: Simultaneous determination of twenty-six components of Flos Lonicerae japonicae–Fructus Forsythiae herb couple using UPLC-ESI-MS/MS: application to its preparations
Source: Royal Society of Chemistry journal article supplement (doi:10.1039/c4ay01477d), 2014-12-08

Simultaneous determination of twenty-six components of *Flos Lonicerae Japonicae* - *Fructus Forsythiae* herb couple using UPLC-ESI-MS/MS,  
Application to its preparations

Wei Zhou<sup>a,b,c</sup>, Jinjun Shan<sup>d</sup>, Wenzheng Ju<sup>e</sup>, Shouchuan Wang<sup>d</sup>, Minxin Meng<sup>f</sup>, Baochang Cai<sup>a</sup>,

Liuqing Di<sup>a,b,c\*</sup>

a College of pharmacy, Nanjing University of Chinese Medicine, Nanjing 210046, PR China

b Jiangsu Engineering Research Center for Efficient Delivery System of TCM

c Nanjing Engineering Research Center for Industrialization of Chinese Medicine Pellets

d Jiangsu Key Laboratory of Pediatric Respiratory Disease, Institute of Pediatrics,

Nanjing University of Chinese Medicine, Nanjing 210046, PR China

e Department of clinical Pharmacology, Affiliated Hospital of Nanjing University of Chinese Medicine, Nanjing 210093, PR China

f Waters Corporation

**SI 1** Structural formulae of analyte standards, including flavonoids, isoflavones, organic acids, saponins, iridoids, phenylethanoid glycosides and lignans.

**SI 2** Representative MRM chromatograms for 26 analytes in *Flos Lonicerae Japonicae* - *Fructus Forsythiae* herb couple in four preparations.

This material is available free of charge via the internet at <http://www.pubs.rsc.org>

**Fig. S11:** Structural formulae of analyte standards, including flavonoids, isoflavones, organic acids, saponins, iridoids, phenylethanoid glycosides and lignans

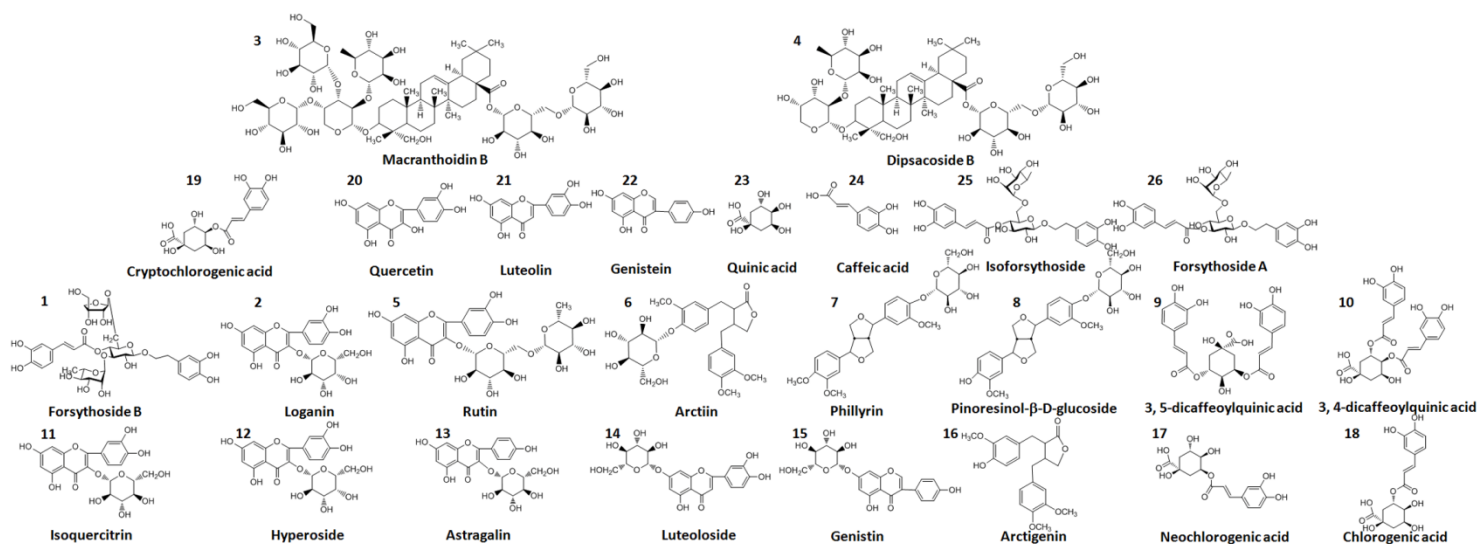

**Fig. S12:** Representative MRM chromatograms for 26 analytes in *Flos Lonicerae Japonicae* - *Fructus Forsythiae* herb couple in four preparations.

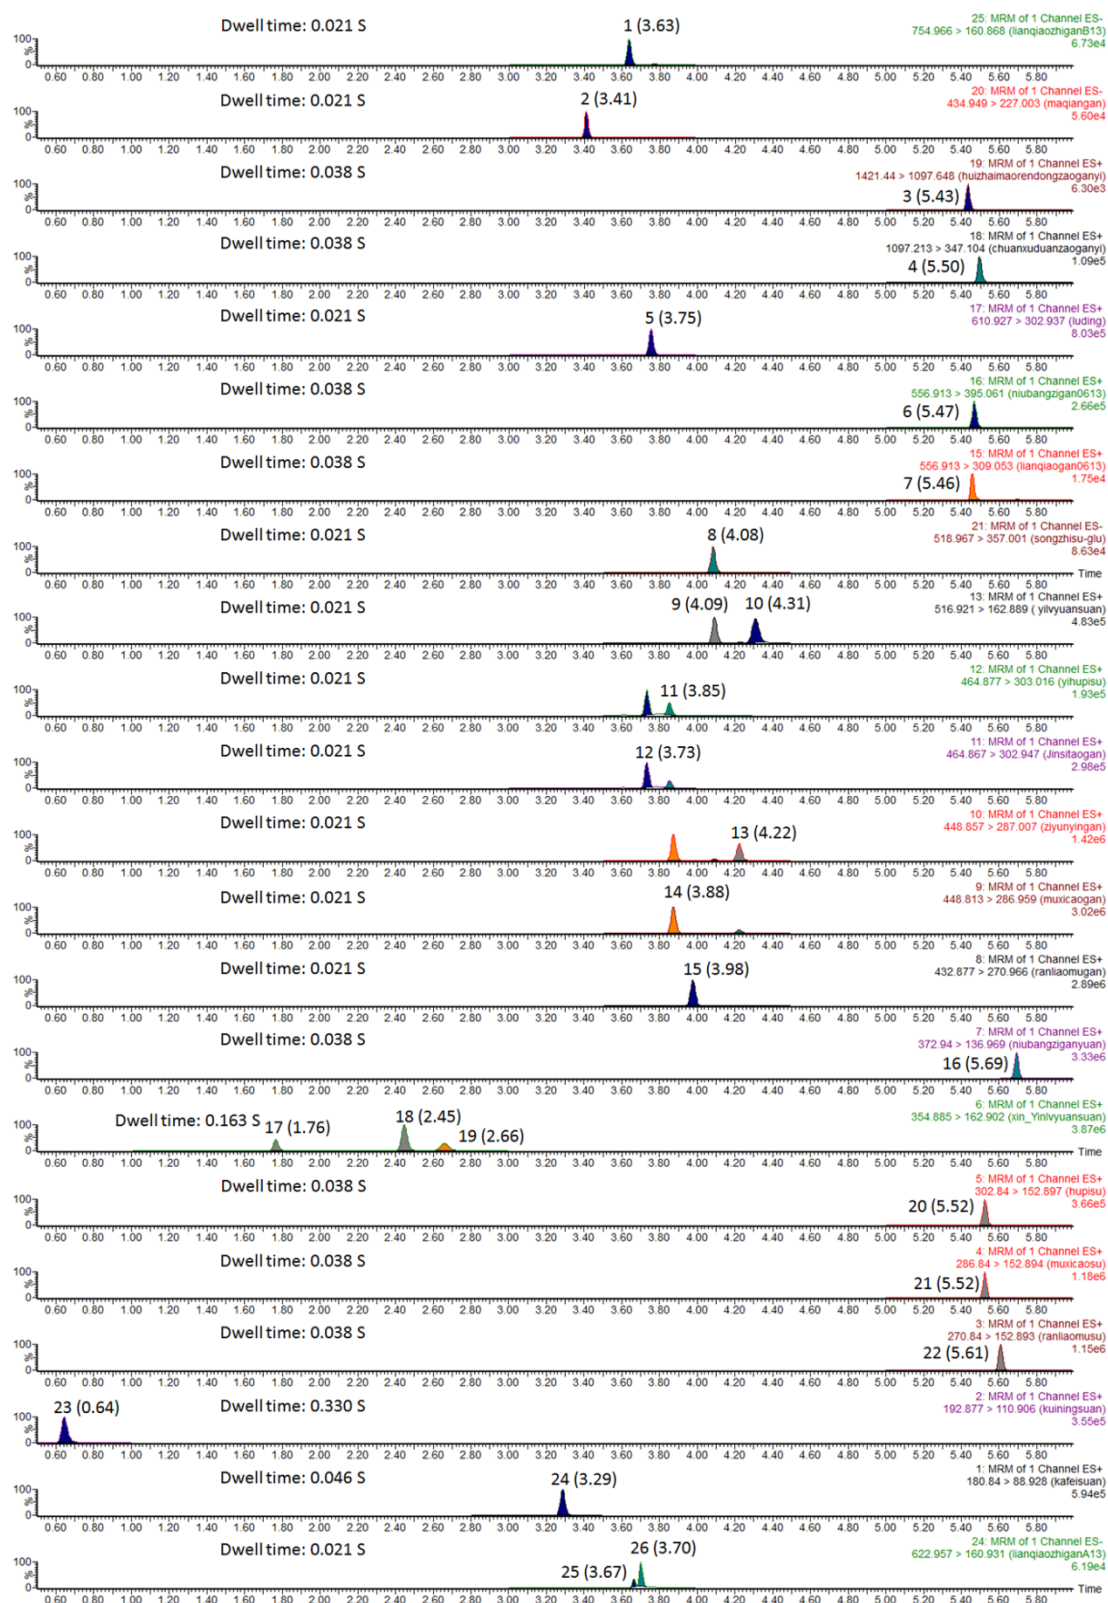

Supplement: c4ay01477d1.pdf [file c4ay01477d1.pdf]
